# Supplementary material for: Three-Dimensional Simulations of Anisotropic Slip Microflows Using the Discrete Unified Gas Kinetic Scheme
Source: MDPI journal article supplement (doi:10.3390/e24070907), 2022-06-30
Supplement: s1 [file s1]

# Supplementary material. Contours for three velocity components and vorticity magnitude

In the supplementary material, the contours for three velocity components and vorticity magnitude of cases (a-n) at  $t=T$ ,  $0.25T$  and  $0.5T$  are present in the 3D view.

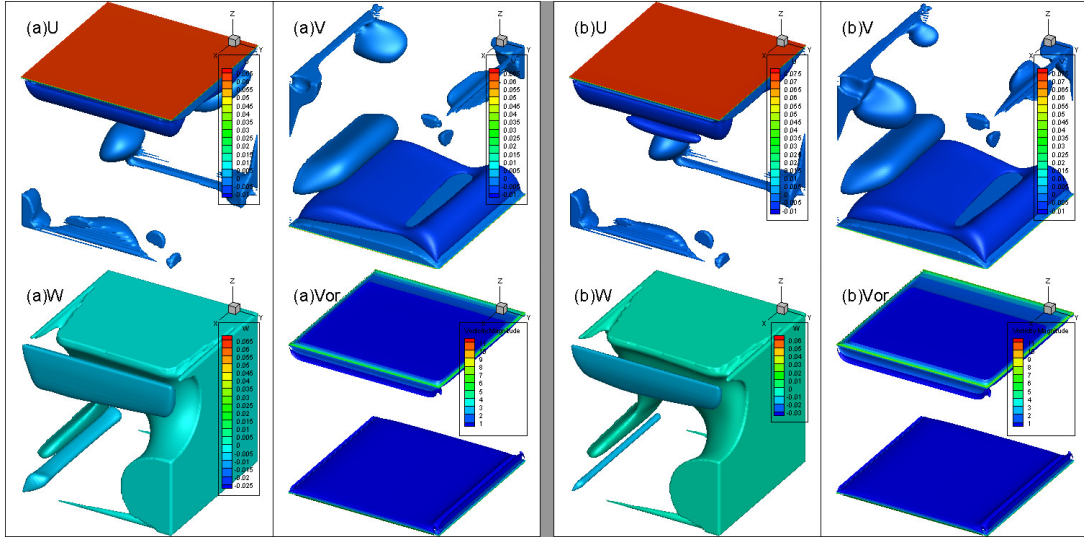

Figure S1. Contours for Velocity U, V, W and Vorticity magnitude at  $t=T$  in case (a) and case (b).

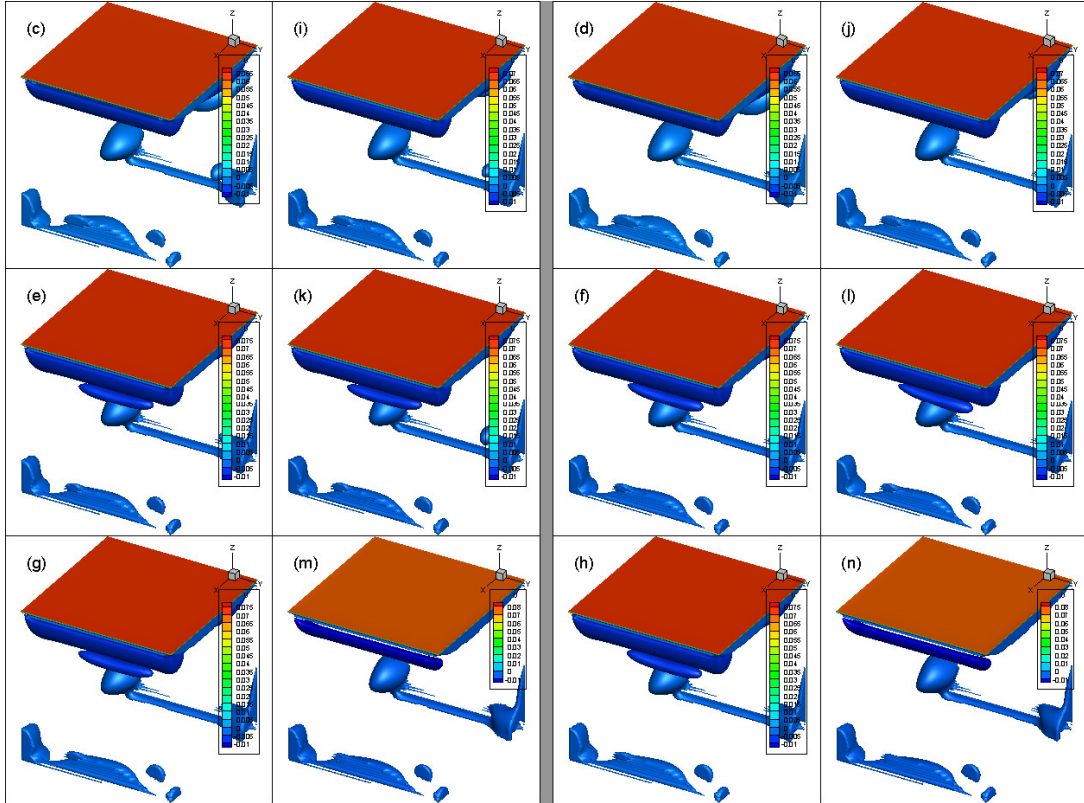

Figure S2. Contours for Velocity U at  $t=T$  in cases (c-n).

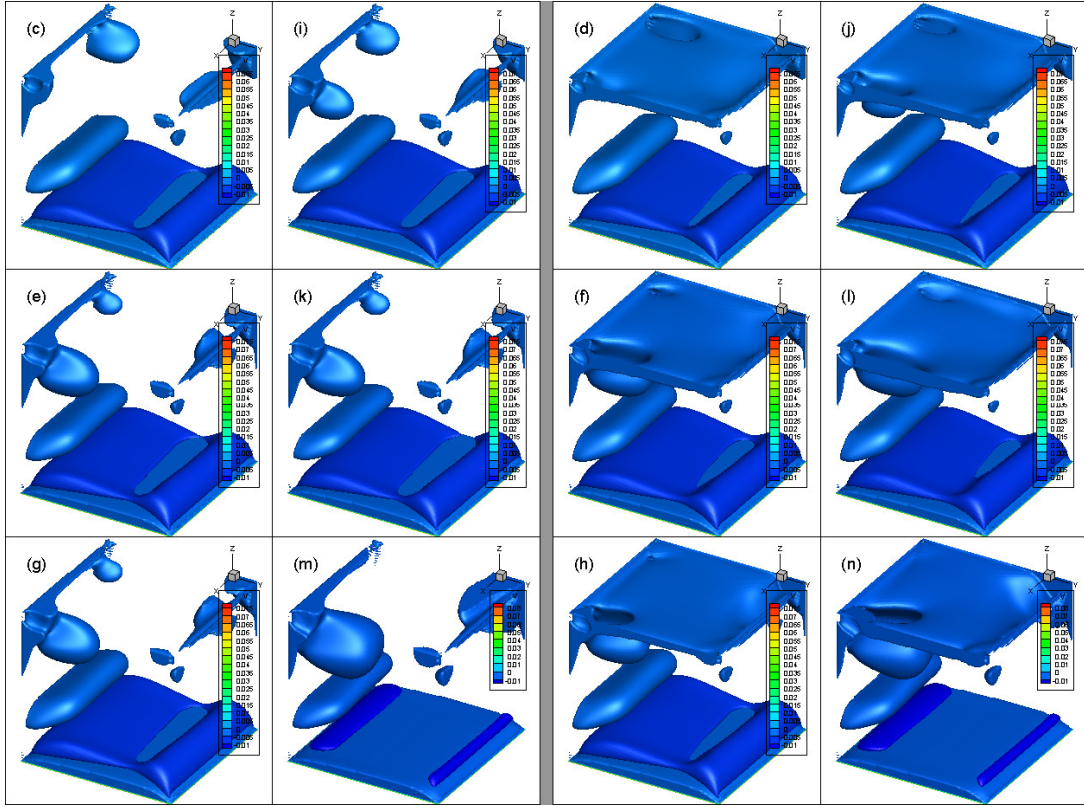

Figure S3. Contours for Velocity  $V$  at  $t=T$  in cases (c-n).

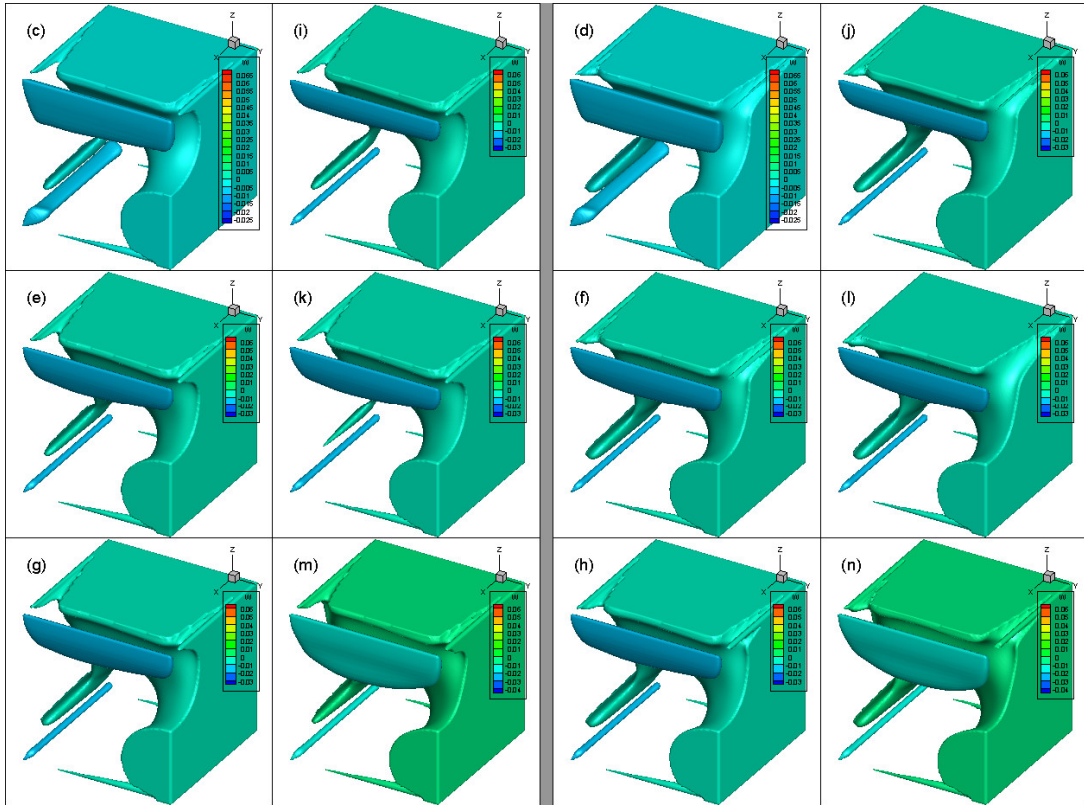

Figure S4. Contours for Velocity  $W$  at  $t=T$  in cases (c-n).

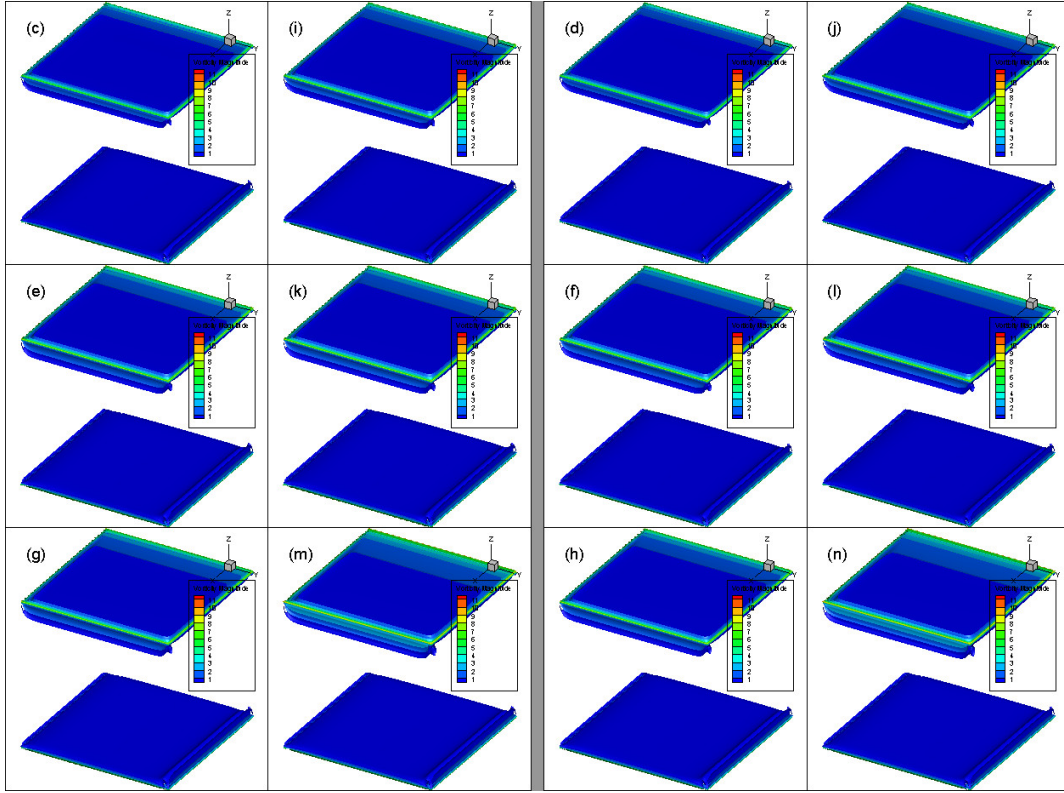

**Figure S5.** Contours for Vorticity magnitude at  $t=T$  in cases (c–n).

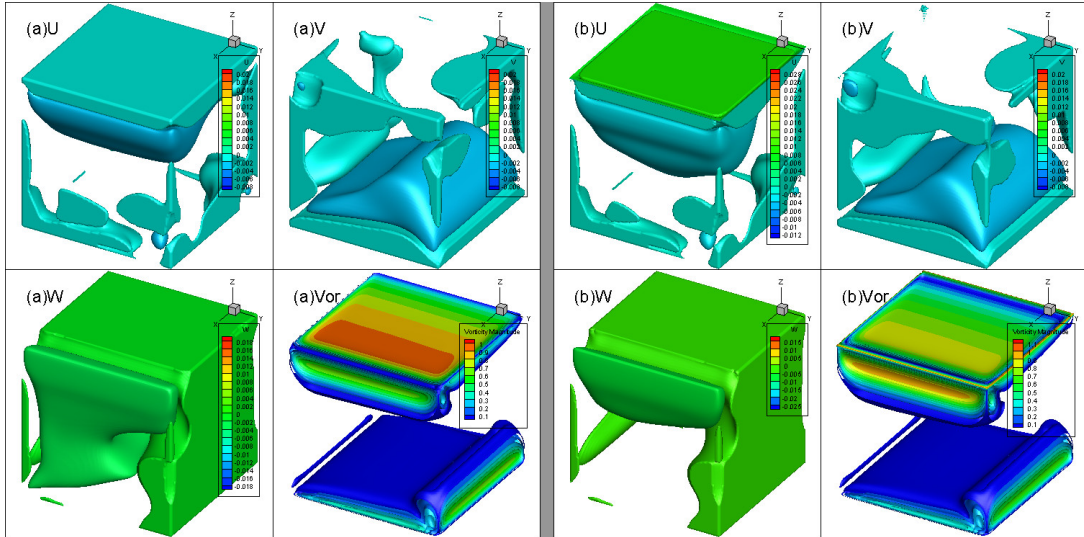

**Figure S6.** Contours for Velocity U, V, W and Vorticity magnitude at  $t=0.25T$  in case (a) and case (b).



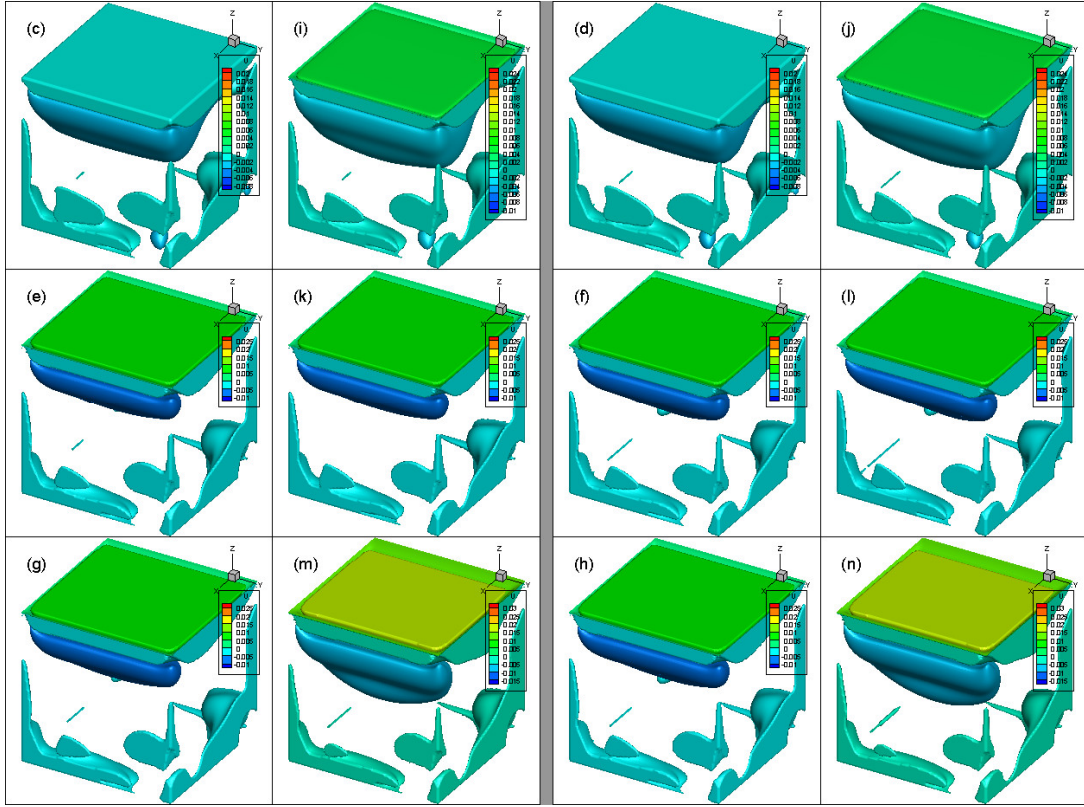

Figure S7. Contours for Velocity U at  $t=0.25T$  in cases (c–n).

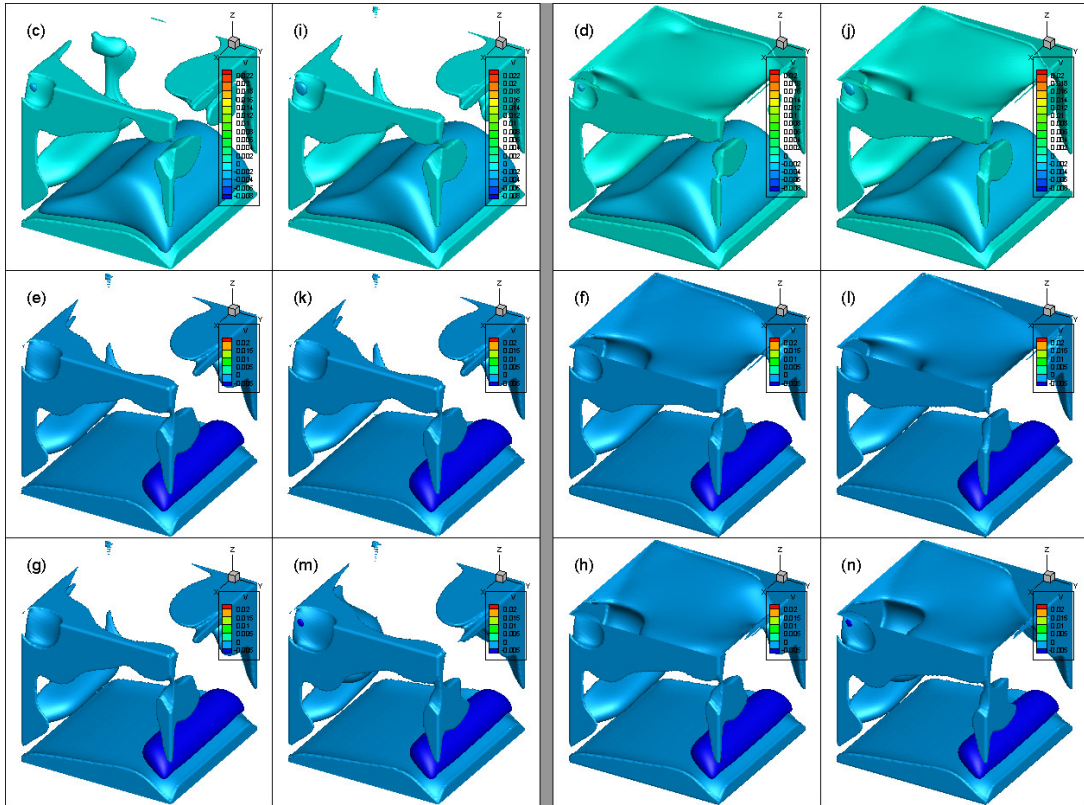

Figure S8. Contours for Velocity V at  $t=0.25T$  in cases (c–n).



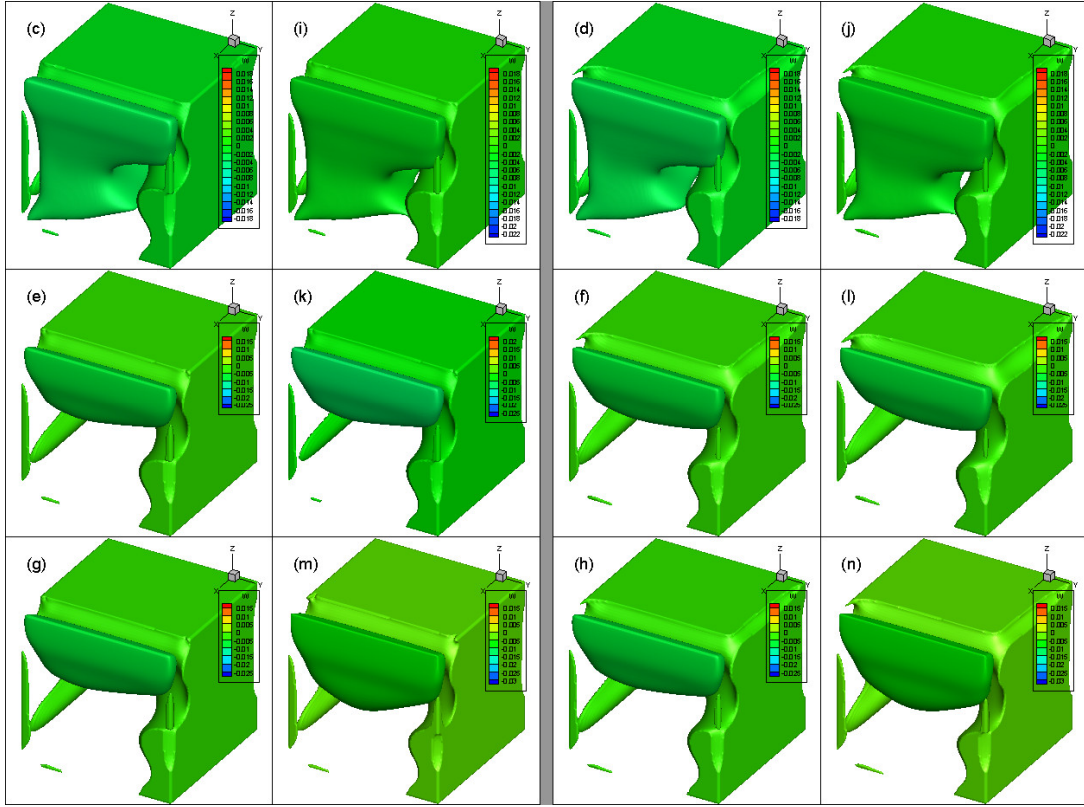

Figure S9. Contours for Velocity  $W$  at  $t=0.25T$  in cases (c-n).

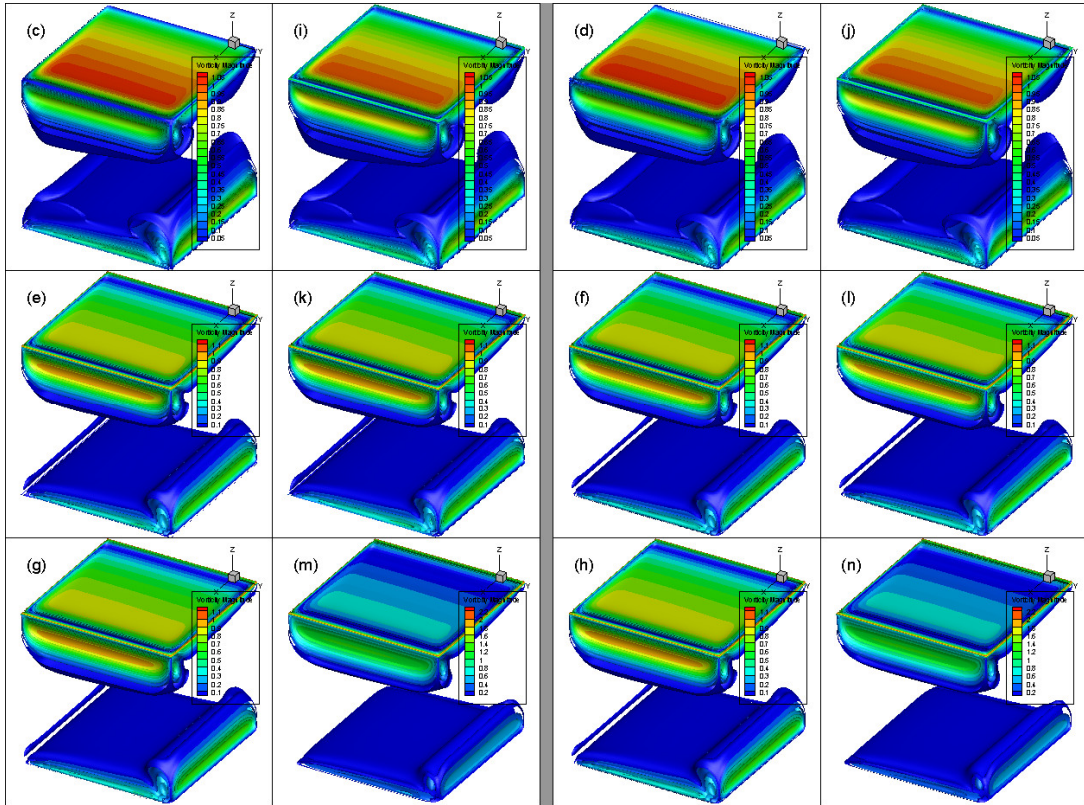

Figure S10. Contours for Vorticity magnitude at  $t=0.25T$  in cases (c-n).

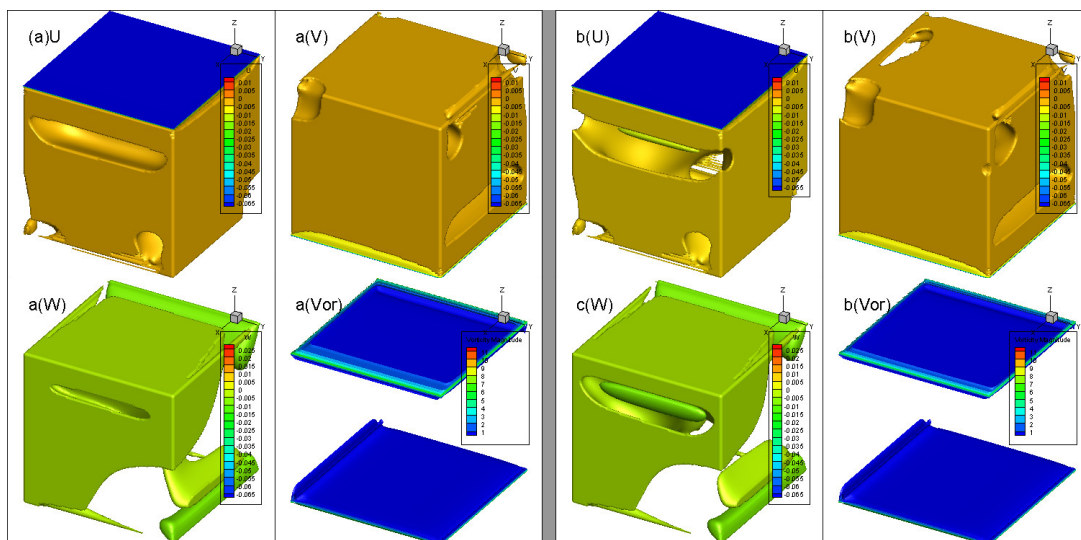

**Figure S11.** Contours for Velocity U, V, W and Vorticity magnitude at  $t=0.5T$  in case (a) and case (b).

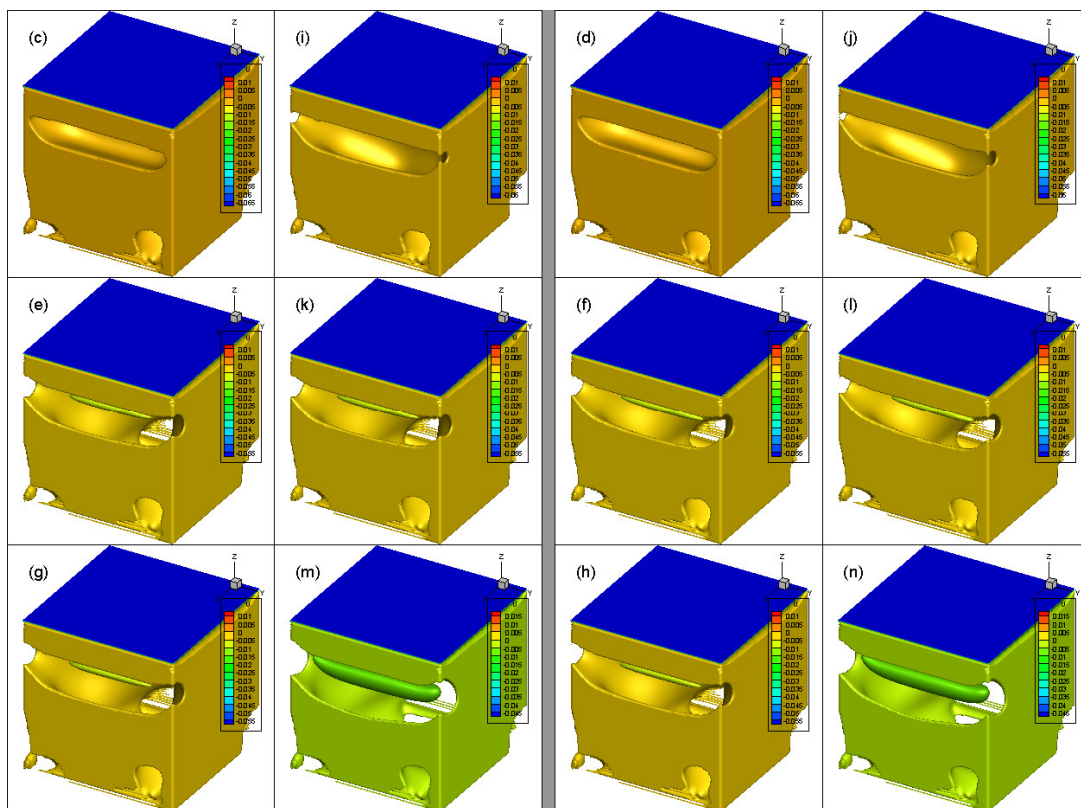

**Figure S12.** Contours for Velocity U at  $t=0.5T$  in cases (c-n).

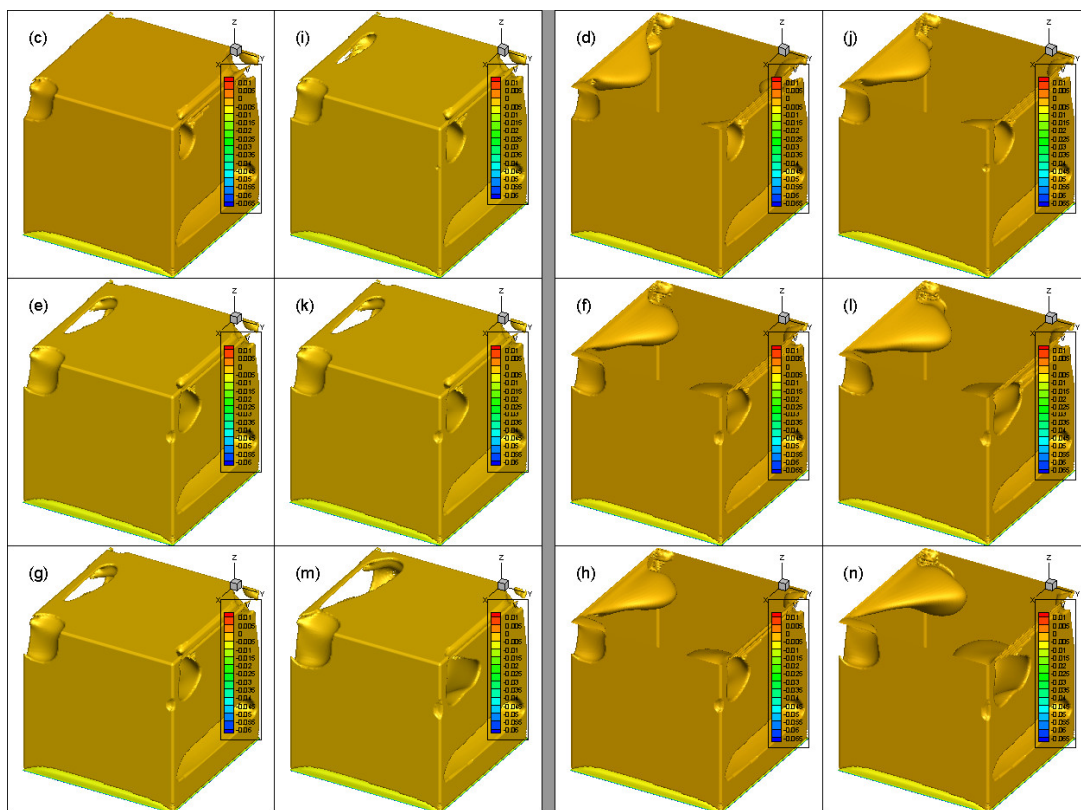

Figure S13. Contours for Velocity V at  $t=0.5T$  in cases (c-n).

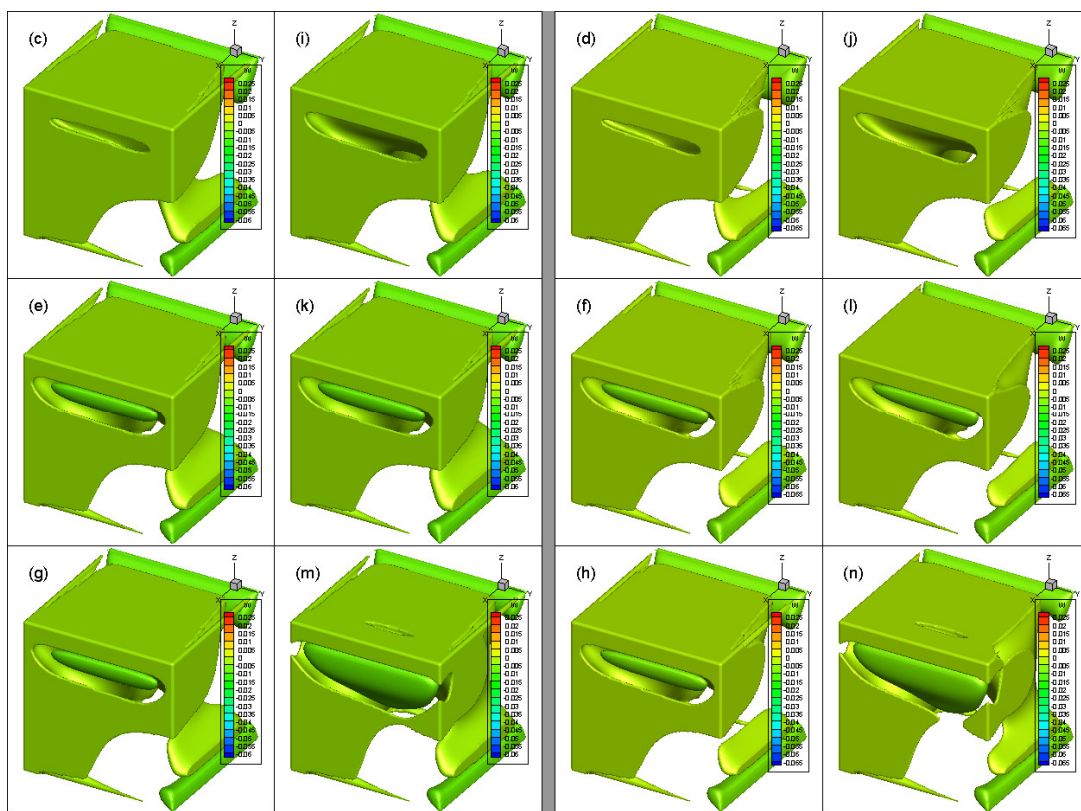

Figure S14. Contours for Velocity W at  $t=0.5T$  in cases (c-n).



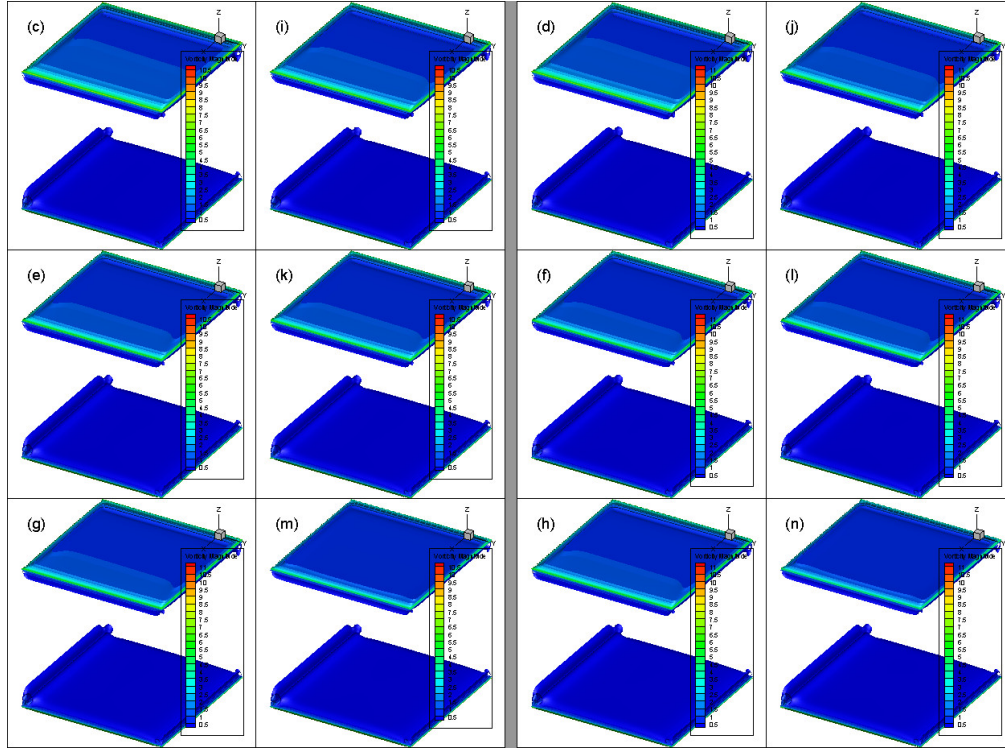

Figure S15. Contours for Vorticity magnitude at  $t=0.5T$  in cases (c-n).

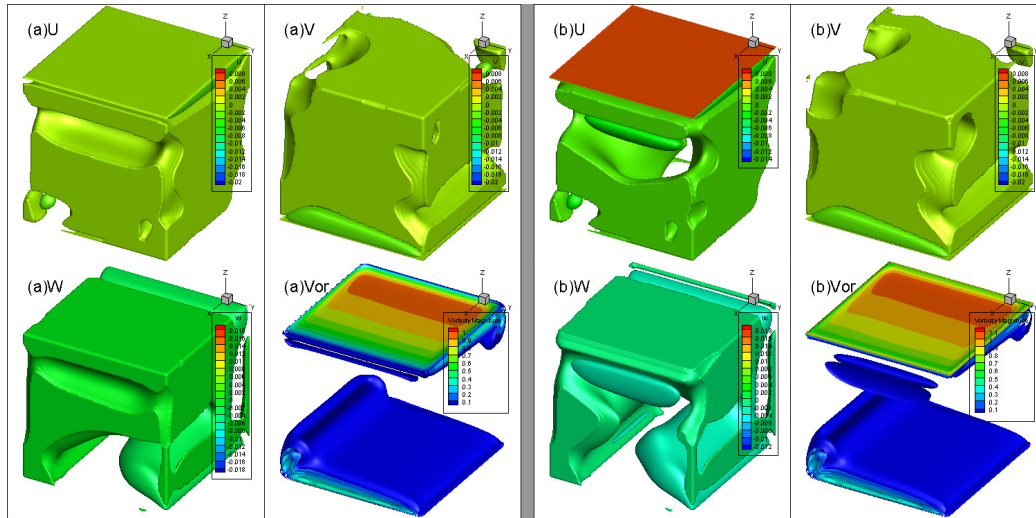

Figure S16. Contours for Velocity  $U$ ,  $V$ ,  $W$  and Vorticity magnitude at  $t=0.75T$  in case (a) and case (b).

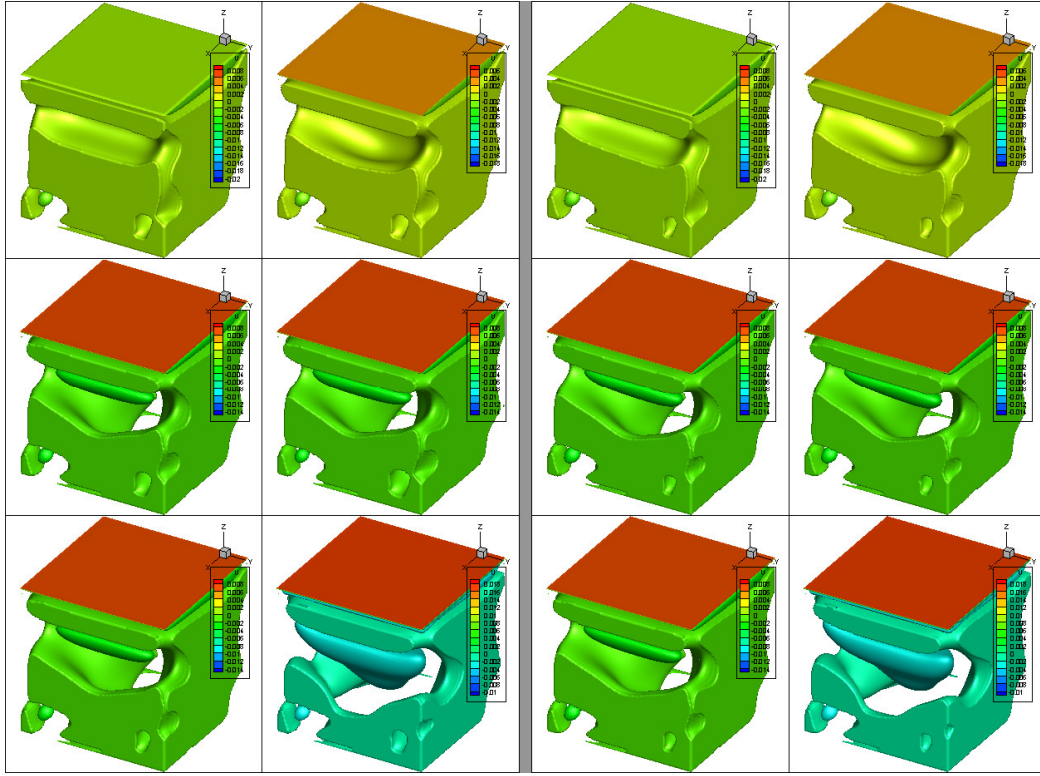

Figure S17. Contours for Velocity U at  $t=0.75T$  in cases (c-n).

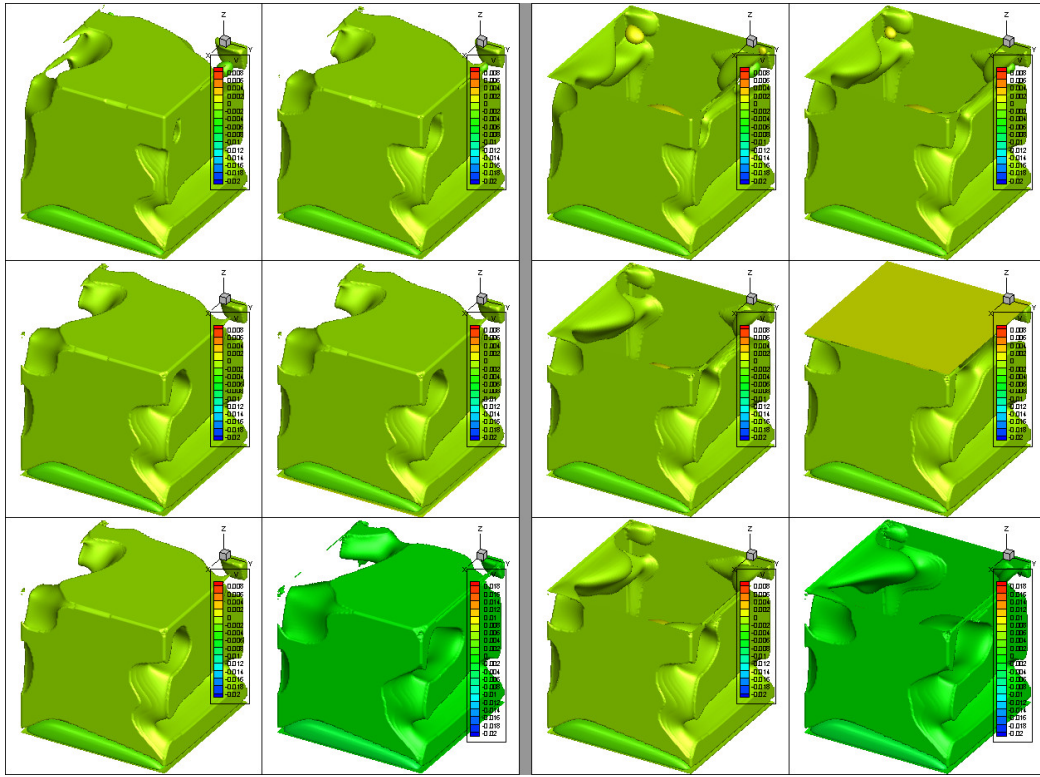

Figure S18. Contours for Velocity V at  $t=0.75T$  in cases (c-n).

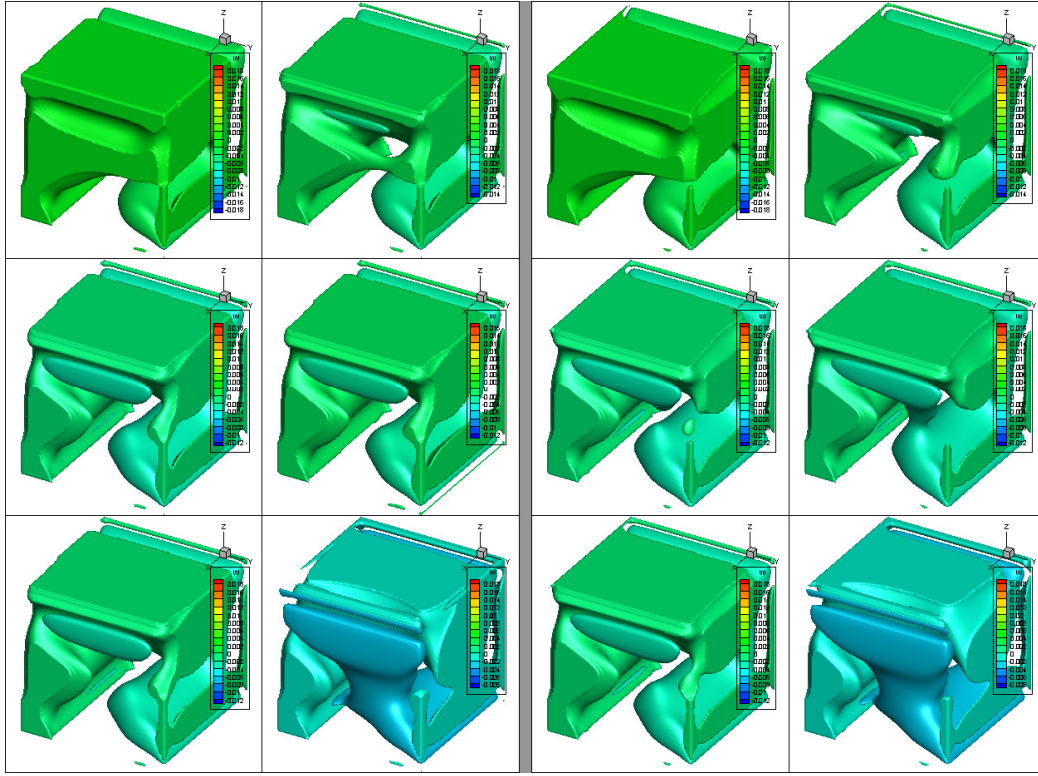

Figure S19. Contours for Velocity  $W$  at  $t=0.75T$  in cases (c-n).

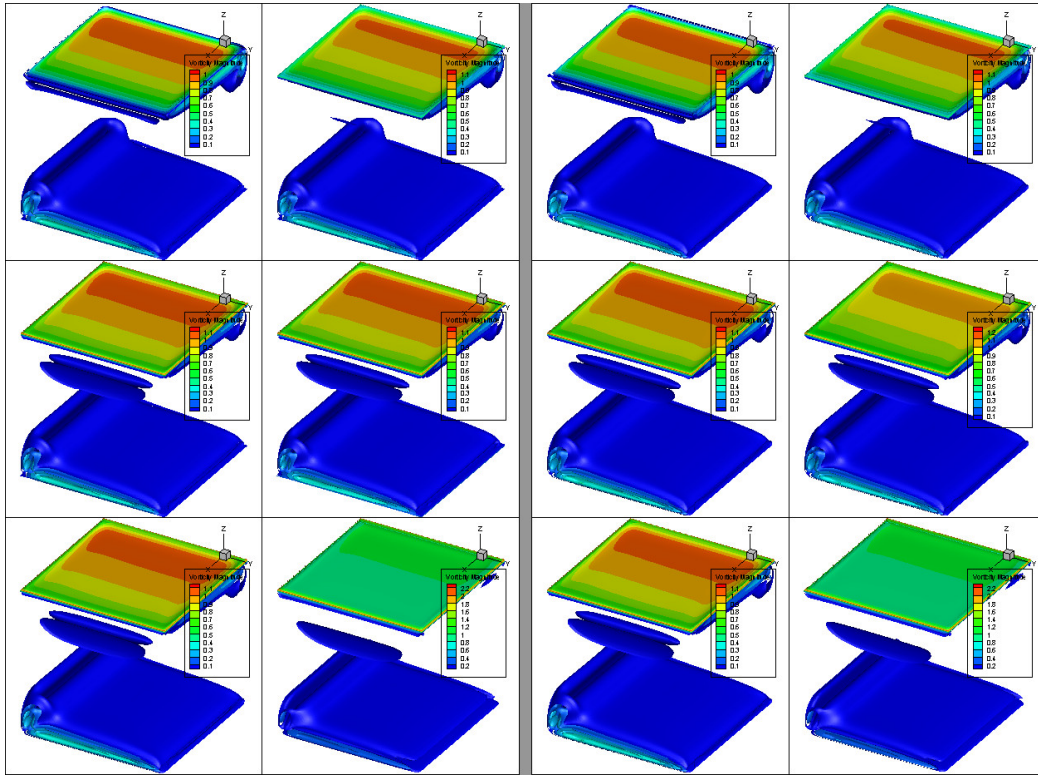

Figure S20. Contours for Vorticity magnitude at  $t=0.75T$  in cases (c-n).
